# Supplementary material for: Potential Effect of Glutamine in the Improvement of Intestinal Stem Cell Proliferation and the Alleviation of Burn-Induced Intestinal Injury via Activating YAP: A Preliminary Study
Source: MDPI journal article supplement (doi:10.3390/nu15071766), 2023-04-04
Supplement: s1 [file s1]

## Supplementary Material

Xia Chen <sup>1,†</sup>, Panyang Zhang <sup>1,†</sup>, Yajuan Zhang <sup>1</sup>, Shijun Fan <sup>1</sup>, Yan Wei <sup>1</sup>, Zhifan Yang <sup>2</sup>, Fengchao Wang <sup>2,\*</sup> and Xi Peng <sup>1,3,\*</sup>

<sup>1</sup> Clinical Medical Research Center, Southwest Hospital, Third Military Medical University (Army Medical University), Chongqing 400038, China; chenxia05201995@163.com (X.C.); zhangpanyang1@126.com (P.Z.); zyj18696625642@126.com (Y.Z.); fanshijun1211@hotmail.com (S.F.); weiyanyan56333849@163.com (Y.W.)

<sup>2</sup> Institute of Combined Injury, State Key Laboratory of Trauma, Burns and Combined Injury, College of Preventive Medicine, Third Military Medical University (Army Medical University), Chongqing, 400038, China; yang1269043@163.com

<sup>3</sup> State Key Laboratory of Trauma, Burns and Combined Injury, Third Military Medical University (Army Medical University), Chongqing 400038, China

\* Correspondence: fengchao.w@foxmail.com (F.W.); pxlrmm@tmmu.edu.cn (X.P.)

† These authors contributed equally to this work.

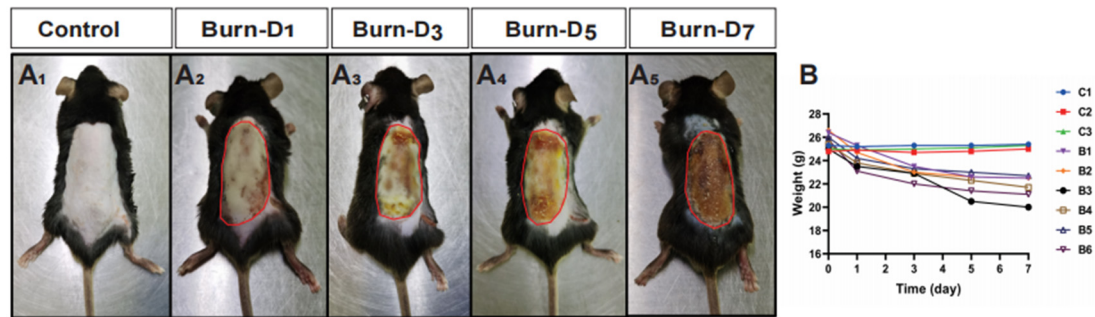

**Figure S1. Establishment of burn mouse model.** (A) Renderings of the scab area on the back of mice in the Burn group and the Control group. (B) Body weight statistics of Burn group and Control group for 7 consecutive days after burns.

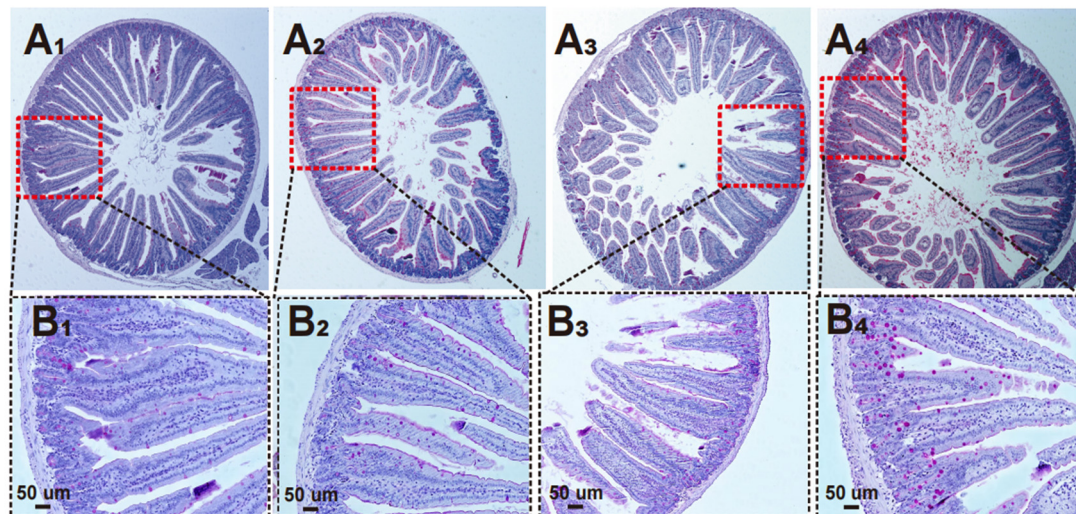

**Figure S2. Effects of Gln treatment on pathological damage of the small intestine after burns injury.** The black arrow represents the site of injury in the small intestine. (A<sub>1</sub>–A<sub>4</sub>) Representative full-transverse sections of the proximal jejunum from control and Gln-treated mice stained with PAS staining: (A<sub>1</sub>) Control group; (A<sub>2</sub>) Burn group; (A<sub>3</sub>) Gln group; (A<sub>4</sub>) Burn+Gln group. (B<sub>1</sub>–B<sub>4</sub>) Enlarged image at the black box in B<sub>1</sub>–B<sub>4</sub> (n=6).

**Table S1. List of primer**

| Name         | Forward primer          | Reverse primer          |
|--------------|-------------------------|-------------------------|
| <b>MSTI</b>  | CTTCCACTACAACATGAGCAGC  | TGCAGGTCCGCACATAATCTT   |
| <b>Yap</b>   | TGAGATCCCTGATGATGTACCAC | TGAGATCCCTGATGATGTACCAC |
| <b>Cdk4</b>  | CAGTCTCAGTGTGAGCCG      | TGCTCCTCCATTAGGAACTCTC  |
| <b>Olfm4</b> | CAGCCACTTTCCAATTTCACTG  | GCTGGACATACTCCTTCACCTTA |
| <b>cdk2</b>  | GCTGGACATACTCCTTCACCTTA | CAGTCTCAGTGTGAGCCG      |
| <b>Sox9</b>  | CAGCCCCTTCAACCTTCCTC    | TGATGGTCAGCGTAGTCGTATT  |
| <b>cdk1</b>  | AGGTACTTACGGTGTGGTGTAT  | CTCGCTTTCAAGTCTGATCTTCT |
| <b>PCNA</b>  | TTGCACGTATATGCCGAGACC   | GGTGAACAGGCTCATTCATCTCT |
